# Supplementary material for: Co3O4/porous electrospun carbon nanofibers as anodes for high performance Li-ion batteries
Source: Royal Society of Chemistry journal article supplement (doi:10.1039/c4ta03206c), 2014-01-01
Supplement: c4ta03206c1.pdf [file c4ta03206c1.pdf]

Electronic Supplementary Information

## **Co<sub>3</sub>O<sub>4</sub>/Porous Electrospun Carbon Nanofibers as Anodes for High Performance Li-ion Batteries**

Sara Abouali,<sup>a</sup> Mohammad Akbari Garakani,<sup>a</sup> Biao Zhang,<sup>a</sup> Hui Luo,<sup>a</sup> Zheng-Long Xu,<sup>a</sup> Jian-Qiu Huang,<sup>a</sup> Jiaqiang Huang<sup>a</sup> and Jang-Kyo Kim<sup>a\*</sup>

<sup>a</sup> Department of Mechanical and Aerospace Engineering, The Hong Kong University of Science and Technology, Clear Water Bay, Kowloon, Hong Kong

\*Email: [mejkkim@ust.hk](mailto:mejkkim@ust.hk)

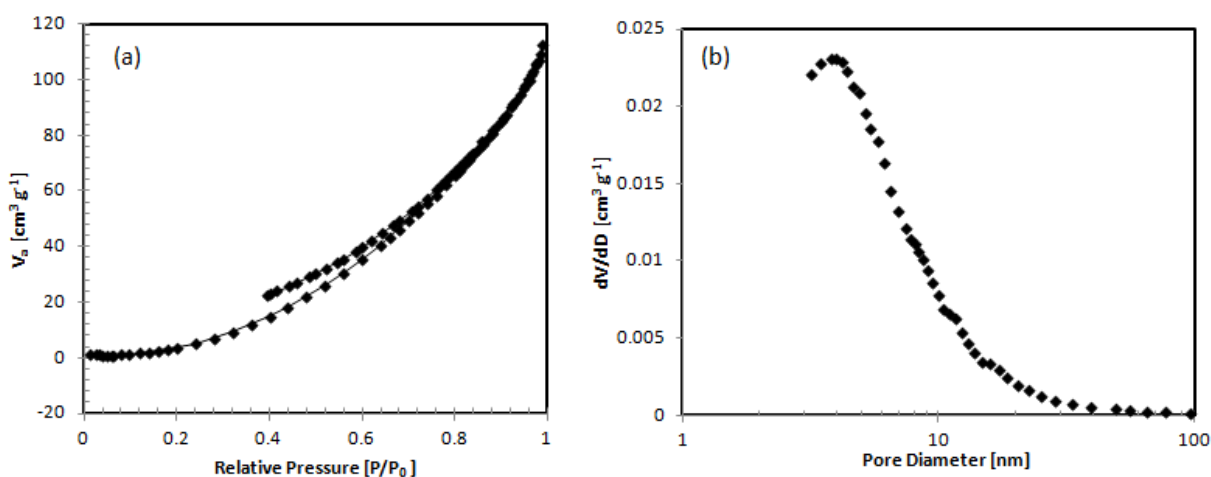

**Fig. S1** (a) Nitrogen adsorption/desorption isotherm curves and (b) pore size distribution of PCNF.

**Table S1.** Pore size distribution of PCNF

| Pore Diameter Range [nm] | Pore Volume [cm <sup>3</sup> g <sup>-1</sup> ] | Distribution [%] |
|--------------------------|------------------------------------------------|------------------|
| Under 6                  | 0.06197                                        | 31.40            |
| 6-8                      | 0.02665                                        | 13.50            |
| 8-10                     | 0.01882                                        | 9.53             |
| 10-12                    | 0.01556                                        | 7.88             |
| 12-16                    | 0.01550                                        | 7.86             |
| 16-20                    | 0.01305                                        | 6.61             |
| 20-80                    | 0.03550                                        | 17.98            |
| Over 80                  | 0.01033                                        | 5.23             |

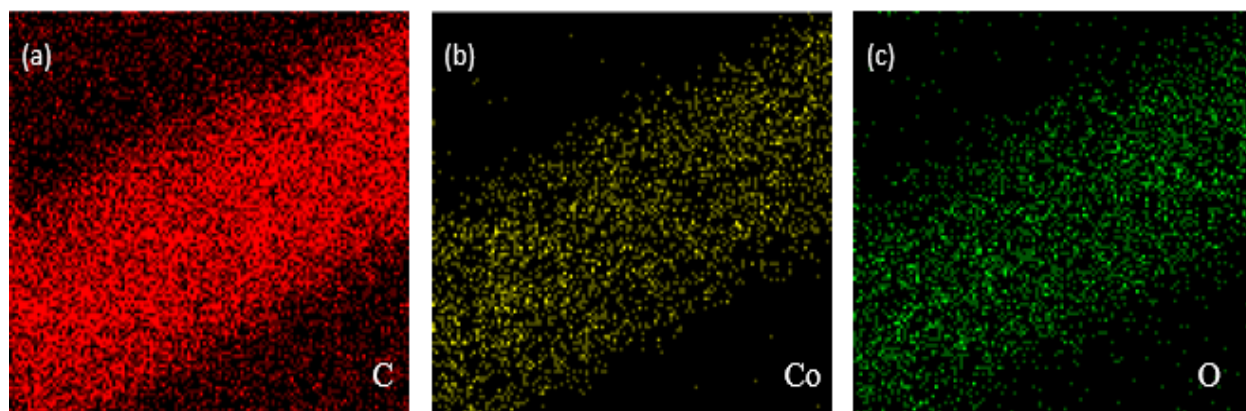**Fig. S2** Elemental maps of (a) carbon; (b) cobalt and (c) oxygen in a single nanofiber containing cobalt acetate after stabilization at 250 °C for 90 min in air.

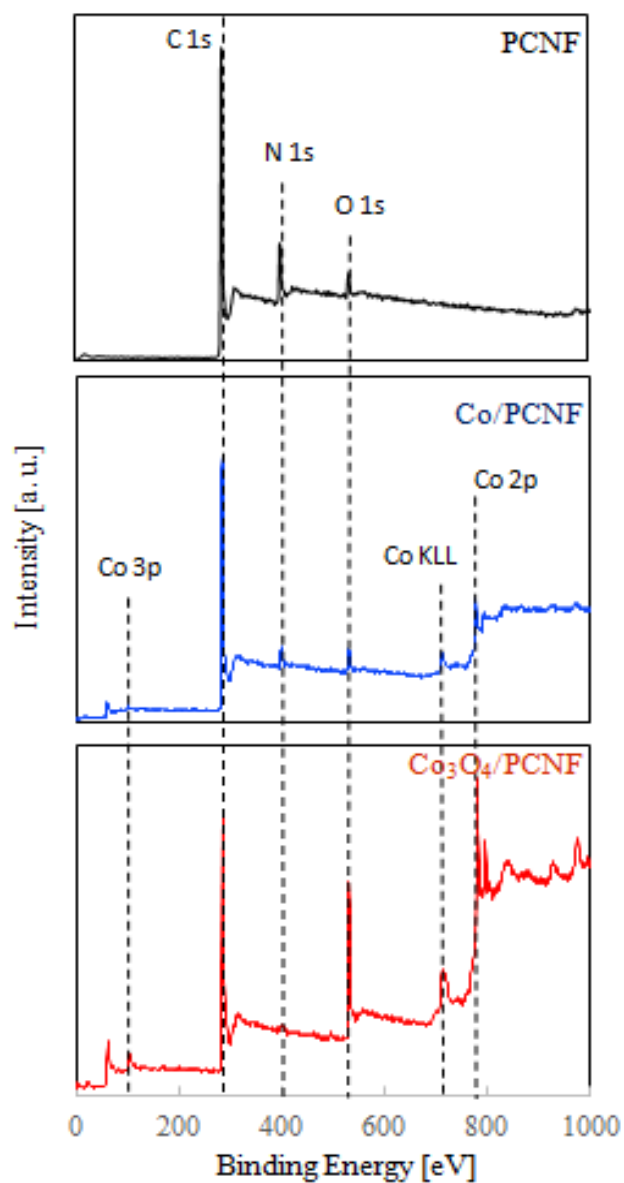

**Fig. S3** General XPS spectra of PCNF, Co/PCNF and Co<sub>3</sub>O<sub>4</sub>/PCNF samples.

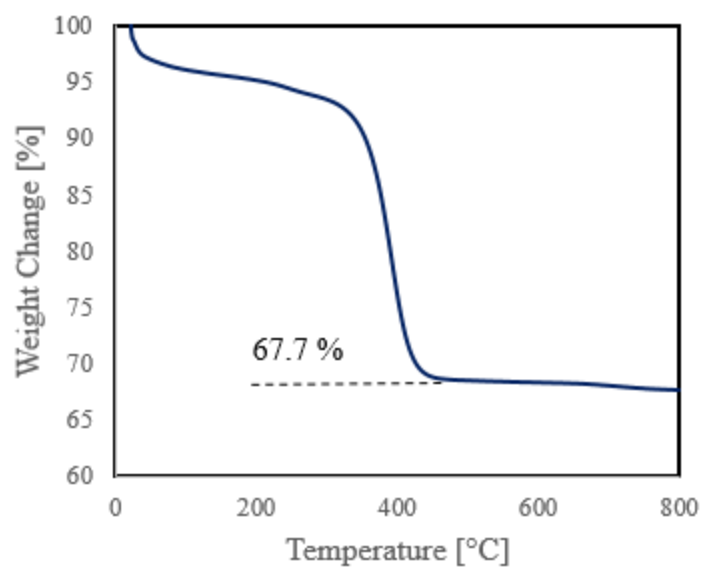

**Fig. S4** TGA curve of Co<sub>3</sub>O<sub>4</sub>/PCNF.

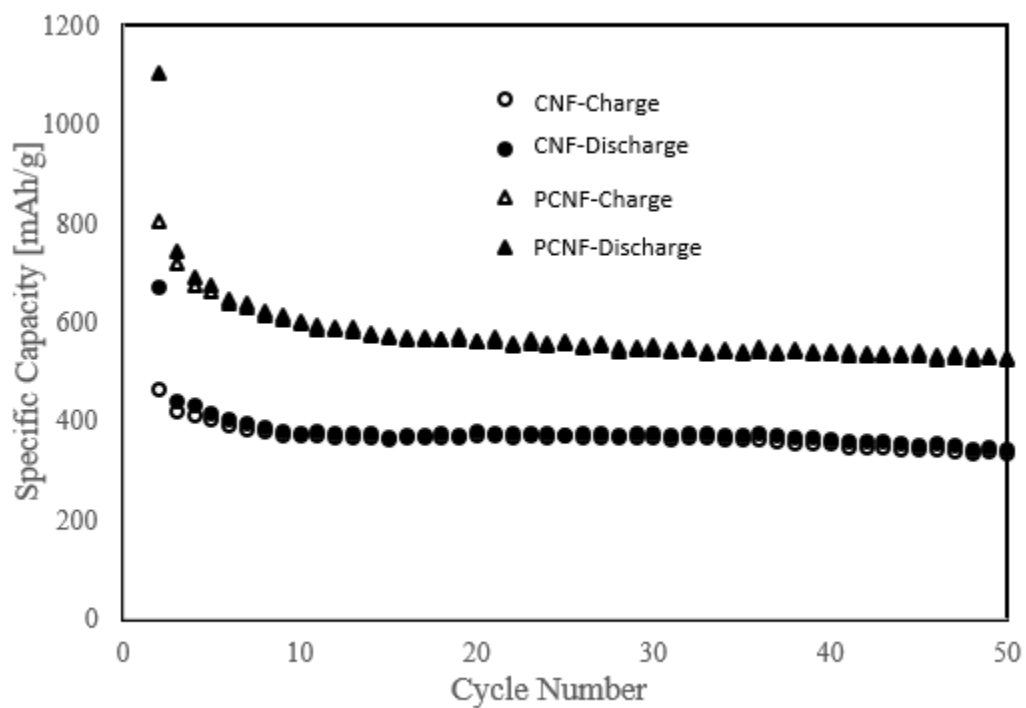

**Fig. S5** Cyclic performance of neat CNF and PCNF electrodes at a current density of 0.1 A g<sup>-1</sup>.
